# Supplementary material for: Temperature-Inducible Transgenic EDS1 and PAD4 in Arabidopsis Confer an Enhanced Disease Resistance at Elevated Temperature
Source: MDPI journal article supplement (doi:10.3390/plants10061258), 2021-06-21
Supplement: s1 [file s1]

**Table S1. Primers used in this study.**

| Primer name    | sequence 5'→3'                         | Purpose            |
|----------------|----------------------------------------|--------------------|
| AT4G26410- qF  | GAGCGAAGAGGCACAATTC                    | qPCR               |
| AT4G26410- qR  | CTCTGCTAAAGCCGTCCT                     | qPCR               |
| PR1-qF         | TTCTTCCCTCGAAAGCTCAA                   | qPCR               |
| PR1-qR         | AAGGCCCACCAGAGTGTATG                   | qPCR               |
| ICS1-qF        | TACTAACCAGTCCGAAAGACG                  | qPCR               |
| ICS1-qR        | GAGGCTTGACAACAACCTCTGT                 | qPCR               |
| HSP70-qF       | CACCGTCTTCGATGCTAAGC                   | qPCR               |
| HSP70-qR       | CTCAGCAGAGAACTGTTTCT                   | qPCR               |
| AT5G12110-qF   | TGGGGAGCTTCGAAATTGGT                   | qPCR               |
| AT5G12110-qR   | TCGACACTTTGGATGTACTC                   | qPCR               |
| EDS1-qF        | AGATTATTCAGGTGATCGAGCA                 | qPCR               |
| EDS1-qR        | TTTATGGGCTTGACACTTTGG                  | qPCR               |
| PAD4-qF        | TCAGTTAAAGATCAAGGAAGGA                 | qPCR               |
| PAD4-qR        | GGCGGAGAAGATTGAGATAGA                  | qPCR               |
| proHSP70-L0-F  | atgaagacaaggaggatcaggacttgggggtttattg  | Goldengate cloning |
| proHSP70-L0-R  | gcgaagacaaatggtattagagatcagaattgttcgcc | Goldengate cloning |
| proAT5G12110-F | atgaagacaaggagagctcacagagagattatttgg   | Goldengate cloning |
| proAT5G12110-R | gcgaagacaaatgggctcaagttaagttctgtggaga  | Goldengate cloning |
